# Supplementary material for: Asymmetric surface effect on the configuration of bilayer Si/SiGe nanosprings
Source: Royal Society of Chemistry journal article supplement (doi:10.1039/c5ra18791e), 2015-01-01
Supplement: c5ra18791e1.pdf [file c5ra18791e1.pdf]

## Supporting Information (SI)

### SI1. Verification of the accuracy of FEAwSE by molecular dynamics simulation

The accuracy of the FEAwSE is verified by comparing the results calculated from MD and FEAwSE. The thickness ratio of the Si and SiGe layers, as well as the composition ratio of Si in SiGe, is fixed at 0.5 throughout this paper. The open source code, LAMMPS,<sup>26</sup> is used as an MD simulation tool, and Tersoff<sup>24</sup> is used as the intermolecular potential. Both Si and SiGe have unreconstructed  $p(1\times 1)$  ideal surfaces. Minimum boundary conditions are imposed to remove rigid body motion. On the other hand, the FEAwSE is performed under the same geometry and material properties as those of the MD simulation.

We first calculated the equilibrium configuration of freestanding Si monolayer thin films. In this case, the surface stress is the only driving force for deformation, and there is no other external force. The number of atomic layers is 34 and 33 for even and odd layers, respectively, and the width-to-thickness and length-to-width (L/W) ratios are both 5. The simulated models are  $\langle 100 \rangle$ /even,  $\langle 100 \rangle$ /odd,  $\langle 110 \rangle/\alpha\alpha$ , and  $\langle 110 \rangle/\beta\alpha$ . The calculation results are shown in Figs. SI1 and SI2. In the even layer case, there is no out of plane deformation in either  $\langle 100 \rangle$ /even or  $\langle 110 \rangle/\alpha\alpha$ . In contrast, when odd layers are used, twisted and bending shapes are obtained in  $\langle 100 \rangle$ /odd and  $\langle 110 \rangle/\beta\alpha$ , respectively. For the twisted shape in the  $\langle 100 \rangle$ /odd model, the twisting angles between the two edges in the FEAwSE and MD simulations are  $25.82^\circ$  and  $25.09^\circ$ , respectively. For the bending shape in the  $\langle 110 \rangle/\beta\alpha$  model, the curvature radii in the FEAwSE and MD simulations are 248.5 and 258.8 nm, respectively, and the pitch angles are 0.50 and 0.03 nm, respectively. The resultant configurations obtained from both methods match well, with a slight difference in the degree of twisting or bending. Here we can see the strong effect of the surface when there is no other external force in the odd layer case. In addition, the effects of surface configuration and size contribute considerably to the equilibrium configuration. Even if the size of the thin film is equivalent, the difference in the surface configuration can lead to a very different equilibrium configuration.

We further proceeded to the case of freestanding Si/SiGe bilayer film, in which Si/Si<sub>0.5</sub>Ge<sub>0.5</sub> bilayer was used. The number of Si atomic layers is 17, and the number of SiGe atomic layers is 17 and 16 for even and odd, respectively. The width-to-thickness and L/W ratios are both 5. The simulated models are  $\langle 100 \rangle$ /even,  $\langle 100 \rangle$ /odd,  $\langle 110 \rangle/\alpha\alpha$ , and  $\langle 110 \rangle/\beta\alpha$ . The results are shown in Figs. SI3 and SI4, and the curvature radius and pitch angle of each model are presented in Table 6. These MD and FEAwSE results also correspond well to each other. The differences of curvature radius in FEAwSE and MD results are less than 10%, and the differences of pitch angle are less than  $1^\circ$ . According to S. Kim *et al.*<sup>17</sup>, the nanoband shape is expected in both the  $\langle 100 \rangle$  and  $\langle 110 \rangle$  directions if the surface effect is neglected. In the even layer case, the nanoband shape is obtained as expected; however, a different trend is observed when odd layers are used. A helical shape (curl in diagonal direction) is obtained in  $\langle 100 \rangle$ /odd, and a nanoband shape is obtained in  $\langle 110 \rangle/\beta\alpha$ . The most probable cause of such a mismatch between the results of this study and that of S. Kim *et al.* is that the misfit strain between the two layers was assumed the only driving force in the study by S. Kim *et al.*, and the surface effect was neglected. The calculated shapes obtained from this study can be explained by the combination of the two driving forces: the misfit strain, which leads to the nanoband shape, and the surface effect, which adds additional curvature in the  $\langle 110 \rangle$  direction. Now we can be assured that the FEAwSE can express the atomic features of thin films properly. In addition, it is clear that the surface effect causes the appearance of helical shapes in  $\langle 100 \rangle$ /odd.

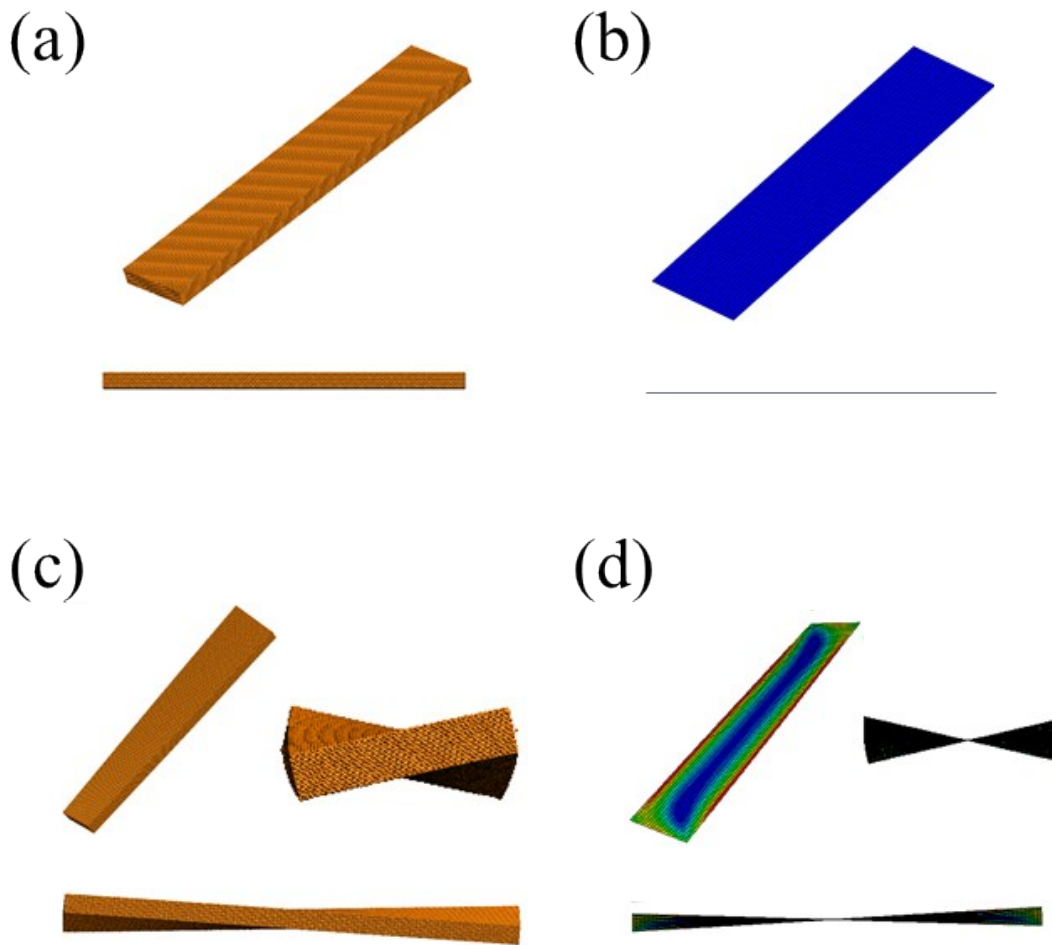

Figure S11. Equilibrium configurations of freestanding Si monolayer thin films. (a)  $\langle 100 \rangle$ /even, calculated by MD. (b)  $\langle 100 \rangle$ /even, calculated by FEAwSE. (c)  $\langle 100 \rangle$ /odd, calculated by MD. (d)  $\langle 100 \rangle$ /odd, calculated by FEAwSE. In the MD results, orange colored particles represent Si atoms. In the FEAwSE results, the color indicates the maximum in-plane principal logarithmic strain.

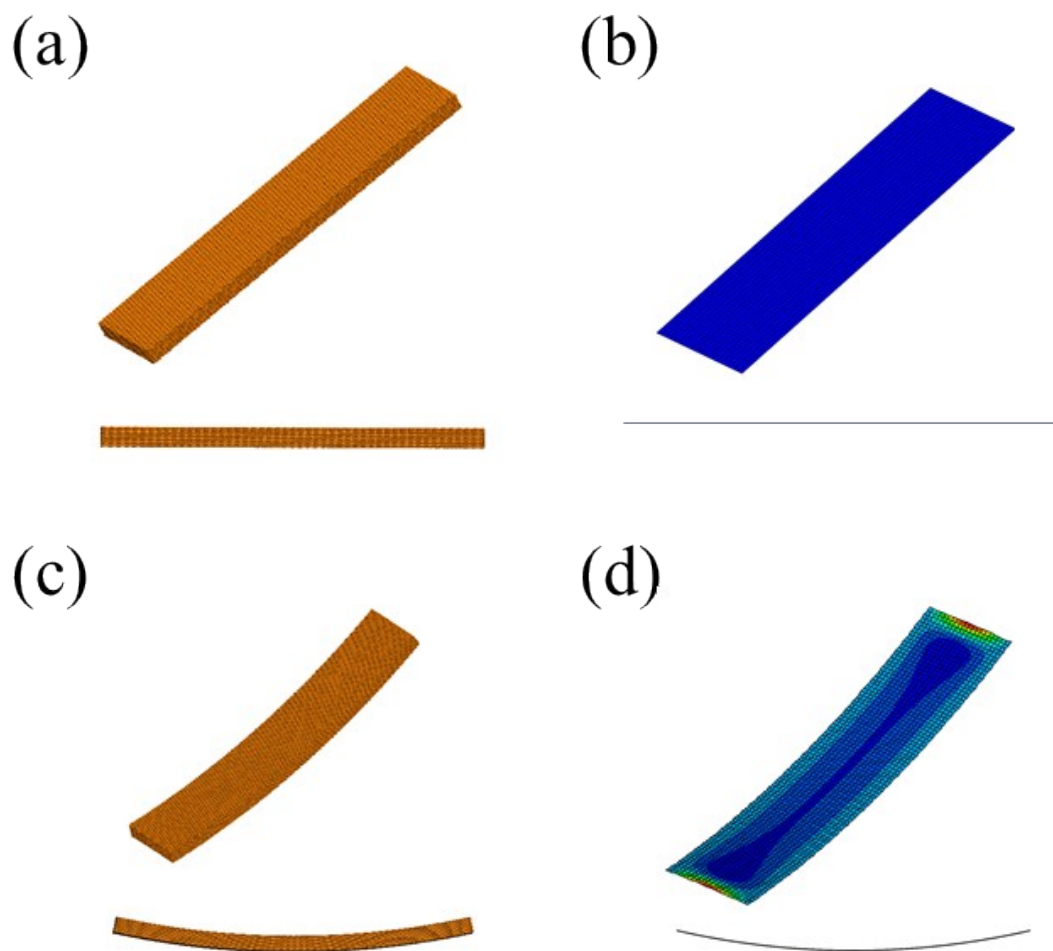

Figure S12. Equilibrium configurations of freestanding Si monolayer thin films. (a)  $\langle 110 \rangle / \alpha\alpha$ , calculated by MD. (b)  $\langle 110 \rangle / \alpha\alpha$ , calculated by FEAWSE. (c)  $\langle 110 \rangle / \beta\alpha$ , calculated by MD. (d)  $\langle 110 \rangle / \beta\alpha$ , calculated by FEAWSE. In the MD results, orange colored particles represent Si atoms. In the FEAWSE results, the color indicates the maximum in-plane principal logarithmic strain.

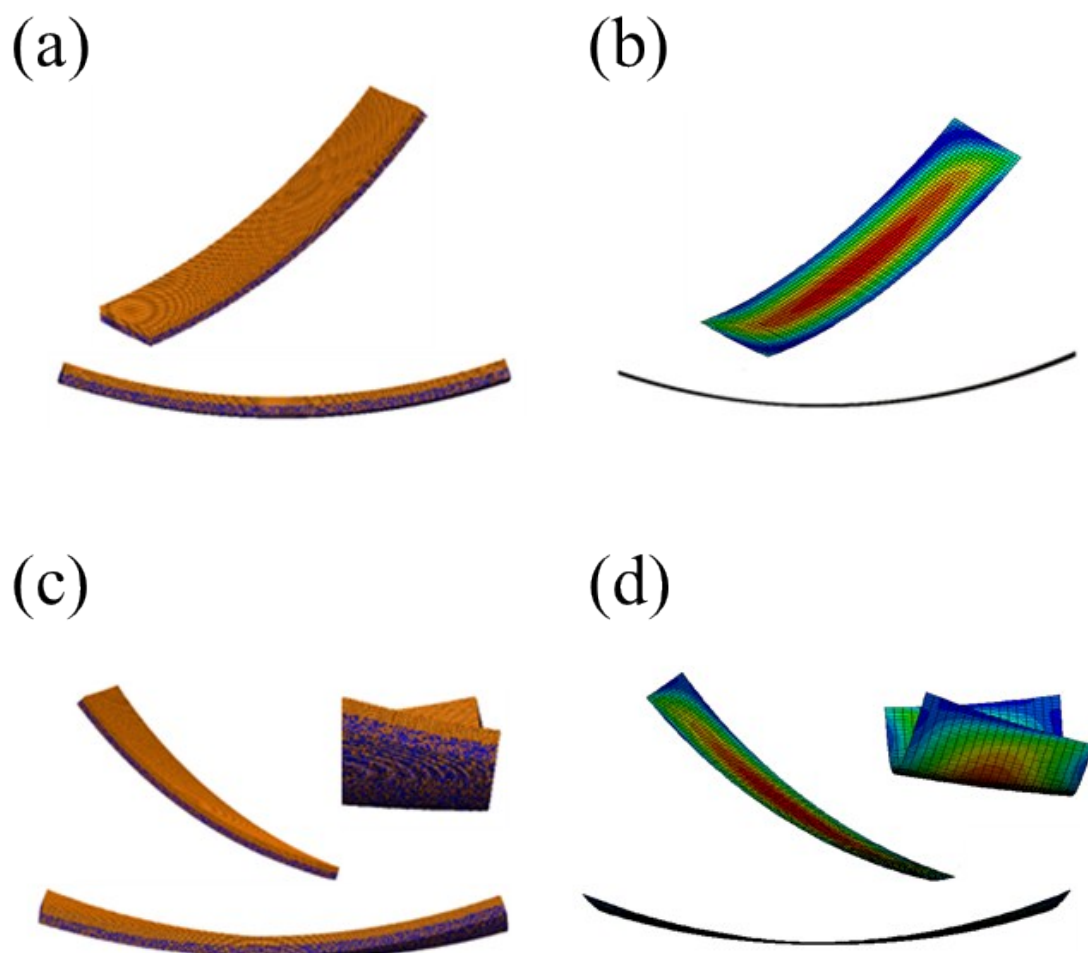

Figure S13. Equilibrium configurations of freestanding Si/SiGe bilayer thin films. (a)  $\langle 100 \rangle$ /even, calculated by MD. (b)  $\langle 100 \rangle$ /even, calculated by FEAwSE. (c)  $\langle 100 \rangle$ /odd, calculated by MD. (d)  $\langle 100 \rangle$ /odd, calculated by FEAwSE. In the MD results, orange colored particles represent Si atoms. In the FEAwSE results, the color indicates the maximum in-plane principal logarithmic strain.

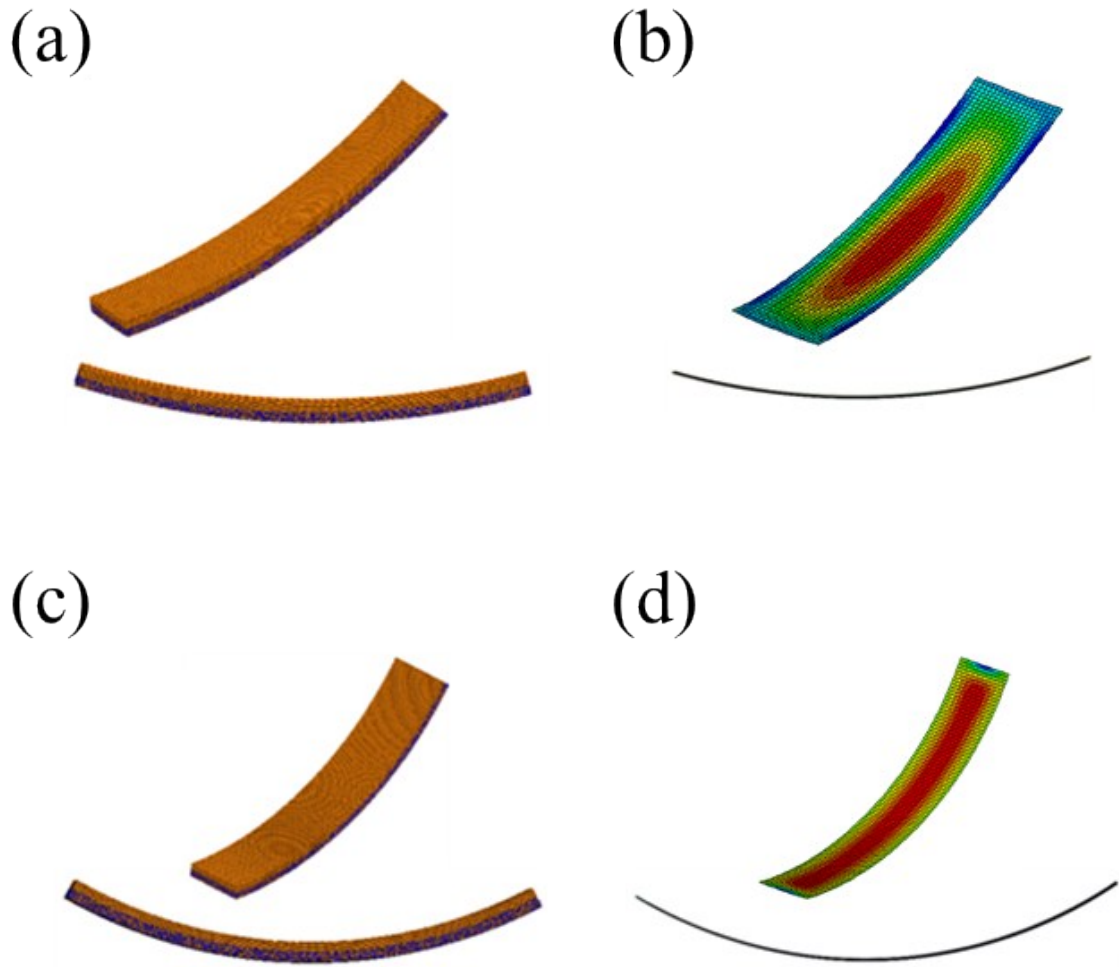

Figure S14. Equilibrium configurations of freestanding Si/SiGe bilayer thin films. (a)  $\langle 110 \rangle / \alpha\alpha$ , calculated by MD. (b)  $\langle 110 \rangle / \alpha\alpha$ , calculated by FEAWSE. (c)  $\langle 110 \rangle / \beta\alpha$ , calculated by MD. (d)  $\langle 110 \rangle / \beta\alpha$ , calculated by FEAWSE. In the MD results, orange colored particles represent Si atoms. In the FEAWSE results, the color indicates the maximum in-plane principal logarithmic strain.

FEAFEAFA
